# Supplementary material
Source: MDPI journal article supplement (https://www.mdpi.com/2813-2882/1/3/9)
Supplement: s1 [file s1]

## **Supplementary Materials**

**Table S1.** Comparison of characteristics between respondent and non-respondent participants

**Table S2.** Childhood adversity statistics

**Table S3.** Frequency and prevalence of 8 types of NSSI

**Table S4.** Logistic regression model of direct and indirect effects through mediators on NSSI and suicidality in males

**Table S5.** Logistic regression model of direct and indirect effects through mediators on NSSI and suicidality in females

**Table S1. Comparison of characteristics between respondent and non-respondent participants**

| Characteristics                  | Participants<br>included | Participants<br>excluded | Total        | <i>P</i> value |
|----------------------------------|--------------------------|--------------------------|--------------|----------------|
| Residential area ( <i>n</i> , %) |                          |                          |              |                |
| Qidong County                    | 454 (25.6)               | 2 (40.0)                 | 456 (25.7)   | 0.581          |
| Guangming District               | 243 (13.7)               | 0 (0.0)                  | 243 (13.7)   |                |
| Zhongshan                        | 1074 (60.6)              | 3 (60.0)                 | 1077 (60.6)  |                |
| School type                      |                          |                          |              |                |
| Public                           | 737 (41.6)               | 1 (20.0)                 | 738 (41.6)   | 0.327          |
| Private                          | 1034 (58.4)              | 4 (80.0)                 | 1038 (58.4)  |                |
| Sex ( <i>n</i> , %)              |                          |                          |              |                |
| Male                             | 994 (56.1)               | 4 (80.0)                 | 998 (56.2)   | 0.283          |
| Female                           | 777 (43.9)               | 1 (20.0)                 | 778 (43.8)   |                |
| Age, y (mean, SD)                | 12.93 ± 0.62             | 12.90 ± 0.45             | 12.93 ± 0.62 | 0.987          |

**Table S2. Childhood adversity statistics**

|                     | Mean | SD   | Median | Mode | Range |
|---------------------|------|------|--------|------|-------|
| Childhood adversity | 3.50 | 1.89 | 3.50   | 2    | 1–10  |

**Table S3. Frequency and Prevalence of 8 Types of NSSI**

| Type of NSSI | Frequency of NSSI ( <i>n</i> , %) |             |
|--------------|-----------------------------------|-------------|
|              | <3 episodes                       | ≥3 episodes |
| Hitting      | 60 (23.0)                         | 201 (77.0)  |
| Hair-pulling | 29 (21.3)                         | 107 (78.7)  |
| Headbanging  | 15 (13.8)                         | 94 (86.2)   |
| Pinching     | 59 (23.0)                         | 198 (77.0)  |
| Scratching   | 14 (10.9)                         | 114 (89.1)  |
| Biting       | 15 (13.3)                         | 98 (86.7)   |
| Burning      | 1 (6.3)                           | 15 (93.8)   |
| Cutting      | 21 (18.1)                         | 95 (81.9)   |

**Table S4. Logistic regression model of direct and indirect effects through mediators on NSSI and suicidality in males**

| Variable                | OR (95%CI)         |                   |                              |                          |                  |  |
|-------------------------|--------------------|-------------------|------------------------------|--------------------------|------------------|--|
|                         | Total effect       | Direct effect     | Indirect effect,<br>Combined | Indirect effect, through |                  |  |
|                         |                    |                   |                              | Depression               | Anxiety          |  |
| NSSI <sup>a</sup>       |                    |                   |                              |                          |                  |  |
| Smoking                 | 3.29 (1.01–10.80)  | 2.16 (0.63–7.39)  | 1.52 (1.16–2.01)             | 2.34 (0.67–8.17)         | 2.25 (0.93–5.42) |  |
| Parent–child separation | 2.23 (1.30–3.86)   | 2.03 (1.20–3.46)  | 1.09 (1.01–1.20)             | 1.04 (0.99–1.11)         | 1.07 (1.01–1.15) |  |
| Emotional abuse         | 1.36 (0.79–2.34)   | 0.96 (0.55–1.67)  | 1.42 (1.13–1.79)             | 1.15 (0.99–1.34)         | 1.32 (1.13–1.55) |  |
| Physical abuse          | 1.82 (1.11–3.00)   | 1.34 (0.84–2.12)  | 1.36 (1.11–1.68)             | 1.15 (0.99–1.32)         | 1.27 (1.06–1.51) |  |
| Being bullied           | 2.10 (1.45–3.00)   | 1.51 (1.06–2.12)  | 1.39 (1.14–1.72)             | 1.14 (0.99–1.31)         | 1.31 (1.12–1.54) |  |
| SI <sup>a</sup>         |                    |                   |                              |                          |                  |  |
| Smoking                 | 4.85 (1.48–15.80)  | 3.42 (0.95–12.18) | 1.42 (1.05–1.92)             | 1.34 (1.07–1.68)         | 1.17 (0.98–1.40) |  |
| Parent–child separation | 1.77 (1.13–2.75)   | 1.63 (1.05–2.53)  | 1.08 (1.01–1.17)             | 1.07 (1.01–1.14)         | 1.03 (0.99–1.07) |  |
| Emotional abuse         | 1.93 (1.34–2.83)   | 1.48 (1.01–2.20)  | 1.31 (1.13–1.52)             | 1.25 (1.09–1.42)         | 1.13 (1.01–1.27) |  |
| Physical abuse          | 1.75 (1.11–2.75)   | 1.35 (0.87–2.10)  | 1.30 (1.09–1.52)             | 1.23 (1.03–1.49)         | 1.11 (0.99–1.23) |  |
| Emotional neglect       | 1.75 (1.11–2.77)   | 1.42 (0.91–2.20)  | 1.23 (1.07–1.40)             | 1.20 (1.05–1.35)         | 1.07 (0.99–1.16) |  |
| Being bullied           | 2.56 (1.73–3.78)   | 1.99 (1.38–2.89)  | 1.28 (1.09–1.52)             | 1.22 (1.05–1.42)         | 1.13 (0.98–1.30) |  |
| SA <sup>a</sup>         |                    |                   |                              |                          |                  |  |
| Smoking                 | 11.47 (3.94–33.45) | 6.05 (1.90–19.11) | 1.90 (1.28–2.83)             | 1.46 (0.99–2.16)         | 1.55 (1.16–2.10) |  |
| Emotional abuse         | 4.53 (1.93–10.70)  | 2.59 (1.15–5.87)  | 1.75 (1.27–2.41)             | 1.35 (1.01–1.80)         | 1.46 (1.11–1.93) |  |
| Being bullied           | 2.66 (1.35–5.21)   | 1.57 (0.76–3.22)  | 1.70 (1.23–2.32)             | 1.32 (1.03–1.70)         | 1.43             |  |

a. Adjusted for regional areas, school type, ethnicity, single child, caregiver's educational level, parenting style, puberty, social support, and emotional management ability.

**Table S5. Logistic regression model of direct and indirect effects through mediators on NSSI and suicidality in females**

| Variable                | OR (95%CI)        |                   |                           |                                     |                  |
|-------------------------|-------------------|-------------------|---------------------------|-------------------------------------|------------------|
|                         | Total effect      | Direct effect     | Indirect effect, Combined | Indirect effect, through Depression | Anxiety          |
| NSSI <sup>a</sup>       |                   |                   |                           |                                     |                  |
| Smoking                 | 1.16 (0.25–5.26)  | 0.73 (0.20–2.69)  | 1.60 (1.00–2.53)          | 1.08 (0.78–1.51)                    | 1.63 (1.21–2.25) |
| Parent–child separation | 1.58 (0.99–2.53)  | 1.30 (0.80–2.10)  | 1.22 (1.09–1.36)          | 1.12 (1.01–1.23)                    | 1.16 (1.05–1.28) |
| Emotional abuse         | 2.83 (1.88–4.26)  | 1.54 (1.03–2.29)  | 1.84 (1.45–2.34)          | 1.40 (1.17–1.67)                    | 1.57 (1.25–1.97) |
| Physical abuse          | 3.32 (1.79–3.06)  | 1.52 (1.19–1.95)  | 1.54 (1.30–1.82)          | 1.26 (1.07–1.48)                    | 1.40 (1.21–1.63) |
| Being bullied           | 2.44 (1.58–3.74)  | 1.46 (0.94–2.25)  | 1.67 (1.36–2.05)          | 1.31 (1.07–1.60)                    | 1.49 (1.23–1.79) |
| SI <sup>a</sup>         |                   |                   |                           |                                     |                  |
| Smoking                 | 1.63 (0.35–7.46)  | 1.13 (0.30–4.31)  | 1.45 (0.99–2.12)          | 1.08 (0.76–1.52)                    | 1.49 (1.13–1.95) |
| Parent–child separation | 1.35 (0.93–1.95)  | 1.14 (0.79–1.65)  | 1.19 (1.09–1.27)          | 1.12 (1.04–1.20)                    | 1.12 (1.04–1.19) |
| Emotional abuse         | 2.12 (1.39–3.25)  | 1.27 (0.86–1.88)  | 1.67 (1.34–2.08)          | 1.39 (1.17–1.65)                    | 1.38 (1.14–1.67) |
| Physical abuse          | 2.32 (1.38–3.94)  | 1.60 (0.95–2.69)  | 1.46 (1.20–1.79)          | 1.26 (1.07–1.49)                    | 1.28 (1.07–1.54) |
| Emotional neglect       | 1.82 (1.20–2.75)  | 1.31 (0.89–1.93)  | 1.39 (1.21–1.60)          | 1.27 (1.09–1.48)                    | 1.19 (1.08–1.31) |
| Being bullied           | 2.16 (1.43–3.29)  | 1.40 (0.97–2.03)  | 1.54 (1.26–1.90)          | 1.31 (1.09–1.57)                    | 1.34 (1.16–1.52) |
| SA <sup>a</sup>         |                   |                   |                           |                                     |                  |
| Smoking                 | 3.35 (0.65–17.29) | 2.23 (0.39–12.94) | 1.51 (0.80–2.80)          | 1.16(0.60–2.25)                     | 1.63(1.21–2.23)  |
| Emotional abuse         | 3.13 (1.72–5.64)  | 1.38 (0.79–2.39)  | 2.27 (1.63–3.16)          | 1.88(1.40–2.51)                     | 1.57(1.23–1.99)  |
| Being bullied           | 2.80 (1.68–4.66)  | 1.45 (0.96–2.18)  | 1.93 (1.49–2.51)          | 1.63(1.26–2.12)                     | 1.48(0.98–2.36)  |

a. Adjusted for regional areas, school type, ethnicity, single child, caregiver’s educational level, parenting style, puberty, social support, and emotional management ability.
